1     **Antibody Upstream Sequence Diversity and Its**  
2     **Biological Implications Revealed by Repertoire**  
3                     **Sequencing**

4     Yan Zhu<sup>1,2,3,4,a†</sup>, Xiuqia Yang<sup>1,2,3,4,b†</sup>, Jiaqi Wu<sup>2,c†</sup>, Haipei Tang<sup>3,d†</sup>, Qilong Wang<sup>3,e</sup>, Junjie Guan<sup>1,2,f</sup>,  
5     Wenxi Xie<sup>2,g</sup>, Sen Chen<sup>2,h</sup>, Yuan Chen<sup>3,i</sup>, Minhui Wang<sup>1,5,6,j</sup>, Chunhong Lan<sup>1,3,k</sup>, Lai Wei<sup>7,l</sup>, Caijun  
6     Sun<sup>8,m</sup>, and Zhenhai Zhang<sup>1,2,3,4,n\*</sup>

7 <sup>1</sup>State Key Laboratory of Organ Failure Research, National Clinical Research Center for Kidney  
8 Disease, Division of Nephrology, Nanfang Hospital, Southern Medical University, Guangzhou,  
9 510515, China.

10 <sup>2</sup>Department of Bioinformatics, School of Basic Medical Sciences, Southern Medical University,  
11 Guangzhou 510515, China.

12 <sup>3</sup>Center for Precision Medicine, Guangdong Provincial People's Hospital, Guangdong Academy of  
13 Medical Sciences, Guangzhou 510080, China.

14 <sup>4</sup>Key Laboratory of Mental Health of the Ministry of Education, Guangdong-Hong Kong-Macao  
15 Greater Bay Area Center for Brain Science and Brain-Inspired Intelligence, Southern Medical  
16 University, Guangzhou 510515, China.

17 <sup>5</sup>Department of Nephrology, Hainan Affiliated Hospital of Hainan Medical College, Haikou  
18 570311, China.

19 <sup>6</sup>Department of Nephrology, Hainan General Hospital, Haikou 570311, China.

20 <sup>7</sup>State Key Laboratory of Ophthalmology, Zhongshan Ophthalmic Center, Sun Yat-sen University,  
21 Guangzhou 510060, China.

22 <sup>8</sup>School of public health, Sun Yat-sen University, Shenzhen 510006, China.

23 †These authors contributed equally to this work.

24 \*To whom correspondence should be addressed:

25 Zhenhai Zhang, [zhenhaisu@163.com](mailto:zhenhaisu@163.com); [zhangzhenhai@gdph.org.cn](mailto:zhangzhenhai@gdph.org.cn)

26 **ORCID:**

27 <sup>a</sup>0000-0003-1105-6491 <sup>b</sup>0000-0003-4036-4995 <sup>c</sup>0000-0003-2204-3557

28 <sup>d</sup>0000-0002-5533-7263 <sup>e</sup>0000-0002-2248-0266 <sup>f</sup>0000-0002-9008-9242

29 <sup>g</sup>0000-0001-6759-7639 <sup>h</sup>0000-0002-6720-8215 <sup>i</sup>0000-0001-9043-5240

30 <sup>j</sup>0000-0001-8121-7786 <sup>k</sup>0000-0001-5030-8247 <sup>l</sup>0000-0002-3300-8506

31 <sup>m</sup>0000-0002-2000-7053 <sup>n</sup>0000-0002-4310-0525

32

## 33 **Abstract**

34       The sequence upstream of antibody variable region (Antibody Upstream Sequence, or AUS)  
35 consists of 5' untranslated region (5' UTR) and two leader regions, L-PART1 and L-PART2. The  
36 sequence variations in AUS affect the efficiency of PCR amplification, mRNA translation, and  
37 subsequent PCR-based antibody quantification as well as antibody engineering. Despite their  
38 importance, the diversity of AUSs has long been neglected. Utilizing the rapid amplification of  
39 cDNA ends (5'RACE) and high-throughput antibody repertoire sequencing (Rep-Seq) technique,  
40 we acquired full-length AUSs for human, rhesus macaque (RM), cynomolgus macaque (CM),  
41 mouse, and rat. We designed a bioinformatics pipeline and discovered 2,957 unique AUSs,  
42 corresponding to 2,786 and 1,159 unique sequences for 5' UTR and leader, respectively.  
43 Comparing with the leader records in the international ImMunoGeneTics (IMGT), while 529 were  
44 identical, 313 were with single nucleotide polymorphisms (SNPs), 280 were totally new, and 37  
45 updated the incomplete records. The diversity of AUSs' impact on related antibody biology was  
46 also probed. Taken together, our findings would facilitate Rep-Seq primer design for capturing  
47 antibodies comprehensively and efficiently as well as provide a valuable resource for antibody  
48 engineering and the studies of antibody at the molecular level.

49

50 **Keywords:** antibody upstream sequences, 5' UTR, leader sequences, Rep-Seq, antibody repertoire

51

## 52 **Introduction**

53       Antibodies represent an essential class molecule constituting adaptive immune system and  
54 can specifically bind to the invading pathogens for the subsequent eradication or clearance [1].  
55 Rep-Seq technology has enabled antibodies to be interrogated in an unprecedented coverage and  
56 depth, by which researchers can obtain millions to even billions of antibody sequences in a single  
57 experiment [2-4]. The application of Rep-Seq has led to a substantial progress in many fields, such  
58 as aging, tumor immunology, infectious diseases, immune surveillance and neutralizing antibody  
59 screening [5,6].

60       Albeit to the successes mentioned above, the potentials of Rep-Seq can be confined by a  
61 series of not fully addressed issues both experimentally and computationally [5]. One of the  
62 primary computational roadblocks is the unknown germline sequence diversity [7-9]. The  
63 uncaptured diversity will lead to germline misassignment and thus bias the downstream analyses.  
64 Besides, the germline polymorphisms of immunoglobulin loci are found to associate with  
65 expressed antibody repertoire and disease predisposition [10-13]. To capture these diversity, many  
66 tools were developed and employed in antibody repertoire studies [7-9], which then led to the  
67 findings of many novel alleles.

68       Despite the progresses mentioned above, the diversity of AUSs were less interrogated. An  
69 AUS contains two consecutive functional elements, namely 5' UTR and leader, both of which  
70 were found to implicate in mRNA transcription and translation [14-21]. Particularly, leader  
71 sequences play a vital role in antibody expression and are often engineered to improve the  
72 efficiency of monoclonal antibody production [16,21,22]. In Rep-Seq studies, the AUSs are often

73 the targets of the PCR primers for obtaining full-length antibody variable regions [23,24].  
74 Furthermore, Mikocziova et al. showed that polymorphisms in AUSs can facilitate the annotation  
75 of antibody variable (V) genes [25]. Owing to their importance aforementioned, we decided to  
76 interrogate the possible diversity of AUSs which were long neglected in the field.

77 We therefore sequenced the antibody repertoire of both heavy and light chains of 5 species,  
78 namely human, rhesus macaque (RM), cynomolgus macaque (CM), mouse and rat. Applying the  
79 devised bioinformatic pipeline to the in-house dataset together with available public resources, we  
80 discovered thousands of unique AUSs. We then examined their functional relevance to the  
81 expression and status of downstream V genes within as well as among species. Our findings here  
82 provided the first overview of antibody AUS features of multiple species and enriched the relevant  
83 knowledge database which would serve as valuable resources for the community.

## 84 **Results**

### 85 **Bioinformatics pipeline for obtaining high-quality AUSs**

86 As shown in Figure 1, we obtained the candidate AUSs through the following six steps: i) V  
87 allele variant detection via IgDiscover with initial species-specific databases downloaded from  
88 IMGT/GENE-DB [7,26]. The newly discovered genes/alleles were merged with initial databases  
89 and carried on for downstream analyses; ii) the sequences from each sample were annotated and  
90 assembled via MiXCR (compared in Zhang et al. [27]) and clonotypes were consequently  
91 extracted based on CDR3s and V and junctional (J) allele usages; iii) each sample were genotyped  
92 via a Bayesian method adapted from TIGGER; iv) the AUS in each clonotype was extracted and  
93 dimed as the initial AUS for that particular V allele; v) for each V allele, the consensus of all

94 initial AUSs were calculated and defined as the final AUS(s). Alleles not in the genotype were  
95 excluded in this step; vi) a scoring-based method was employed to retain the most confident AUSs.  
96 Further details on each of these steps can be found in [Materials and Methods](#).

Figure 1

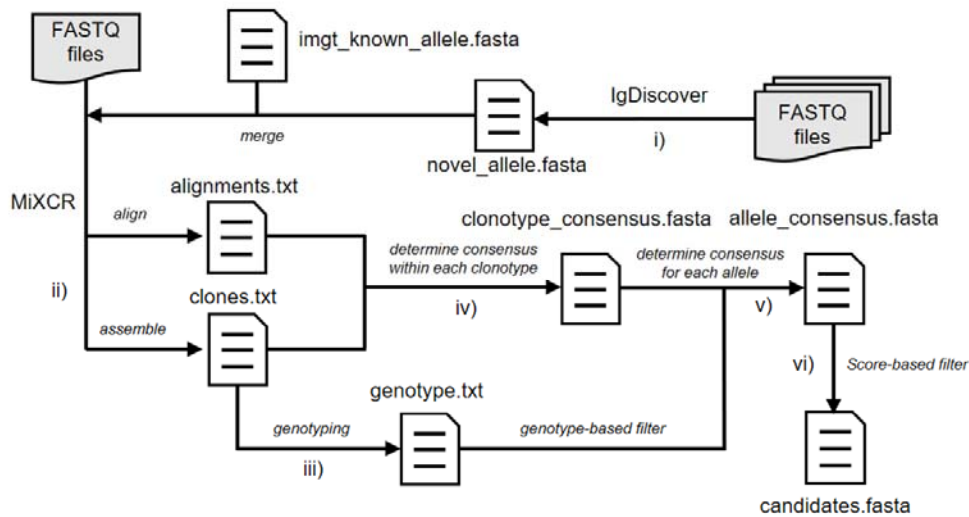

**Figure 1. The AUS identification pipeline.** The AUS identification pipeline is comprised with six steps, including i) V allele variant detection, ii) sequence annotation and assembly, iii) genotyping, iv) identification of consensus sequences within clonotypes, v) identification of consensus sequences within V alleles, and vi) score-based filtration.

97 **Leaders are more conserved than 5' UTRs**

98 Utilizing the bioinformatics pipeline introduced above, we found 2,957 unique AUSs,  
99 corresponding to 2,786 and 1,159 unique sequences for 5' UTR and leader in all five species,  
100 respectively ([Table 1 and Supplementary Table 1](#)). The percentage of V genes with discovered  
101 AUSs ranged from 7.7% (52 genes for kappa chain of RM) to 56.9% (33 genes for lambda chain  
102 of human). For all chain types across five species, we discovered AUSs for up to 73.9% of the  
103 genes with complete leaders in IMGT/GENE-DB. Of these, 70% human heavy chain AUSs  
104 displayed previously unreported polymorphisms ([Supplementary figure 1 and Supplementary](#)  
105 [Table 2](#)) which may affect Rep-Seq capture efficiency and antibody production. For human V gene  
106 alleles of unknown or incomplete leader according to IMGT/GENE-DB, 43, 26, and 26 (47.3%,  
107 56.5% and 55.3%) AUSs were revealed for heavy, kappa and lambda chain V genes, respectively.

108 Besides, we found the largest number of unique novel sequences for both leader and 5' UTR  
109 in human, probably due to the largest sample size for human among studied species ([Figure 2a and](#)  
110 [Supplementary figure 2a](#)). This demonstrated high diversity of AUSs in human that should not be  
111 neglected and the power of analyzing large dataset. We observed the highest ratio of leader  
112 sequences consistent with known ones in mouse and rat but the lowest in RM. It is worth  
113 mentioning that the 5' UTR sequences curated by IMGT are either partial or contain additional  
114 lengthy intron and upstream regulatory elements [25]. Therefore, a considerable number of 5'  
115 UTRs were part of their counterparts on IMGT or *vice versa*. For CM, all 132 5' UTRs discovered  
116 in this study were novel.

117 For all species, more than half of the leaders for heavy and kappa were 57 bp in length  
118 ([Figure 2b and Supplementary figure 2b](#)). In contrast, the lambda chain exhibited a mode length of



119 60 bp. The length distribution of 5' UTRs were characterized by long tails (for example, ranging  
120 from 3 to 133 bp for human heavy chain) and peaked at different lengths for different species.  
121 Thus, the conservation of the leader sequence length across species might be a result of its  
122 functional importance. Population wise, we found the leaders consistent with IMGT records  
123 showed similar frequencies in donors with those different from IMGT, which indicated the  
124 reliability of the newly identified AUSs ([Figure 2c](#) and [Supplementary figure 2c](#)). Individual genes  
125 exhibited high diversity with regard to their AUSs. Only less than 5% and around 30% of human  
126 V genes used single unique 5' UTRs and leaders, respectively. A single V gene may use up to 44  
127 different 5' UTRs (human IGHV1-69) and 11 leader sequences (human IGHV3-53) ([Figure 2d](#)).  
128 This diversity was consistent in all five species ([Supplementary figure 3](#)). The higher diversity of  
129 5' UTR compared to leader was also reflected in the combinatorial frequencies, in which 54 out of  
130 57 (94.7%) genes have more diverse 5' UTR than leader ([Supplementary figure 4](#)), and the more  
131 consistent result of leader than 5' UTR with Mikocziova et al. [25] ([Supplementary figure 5](#)).  
132 Taken together, these results indicated that leader sequences are more conservative than 5' UTRs'  
133 and more critical for the functionality of antibodies.

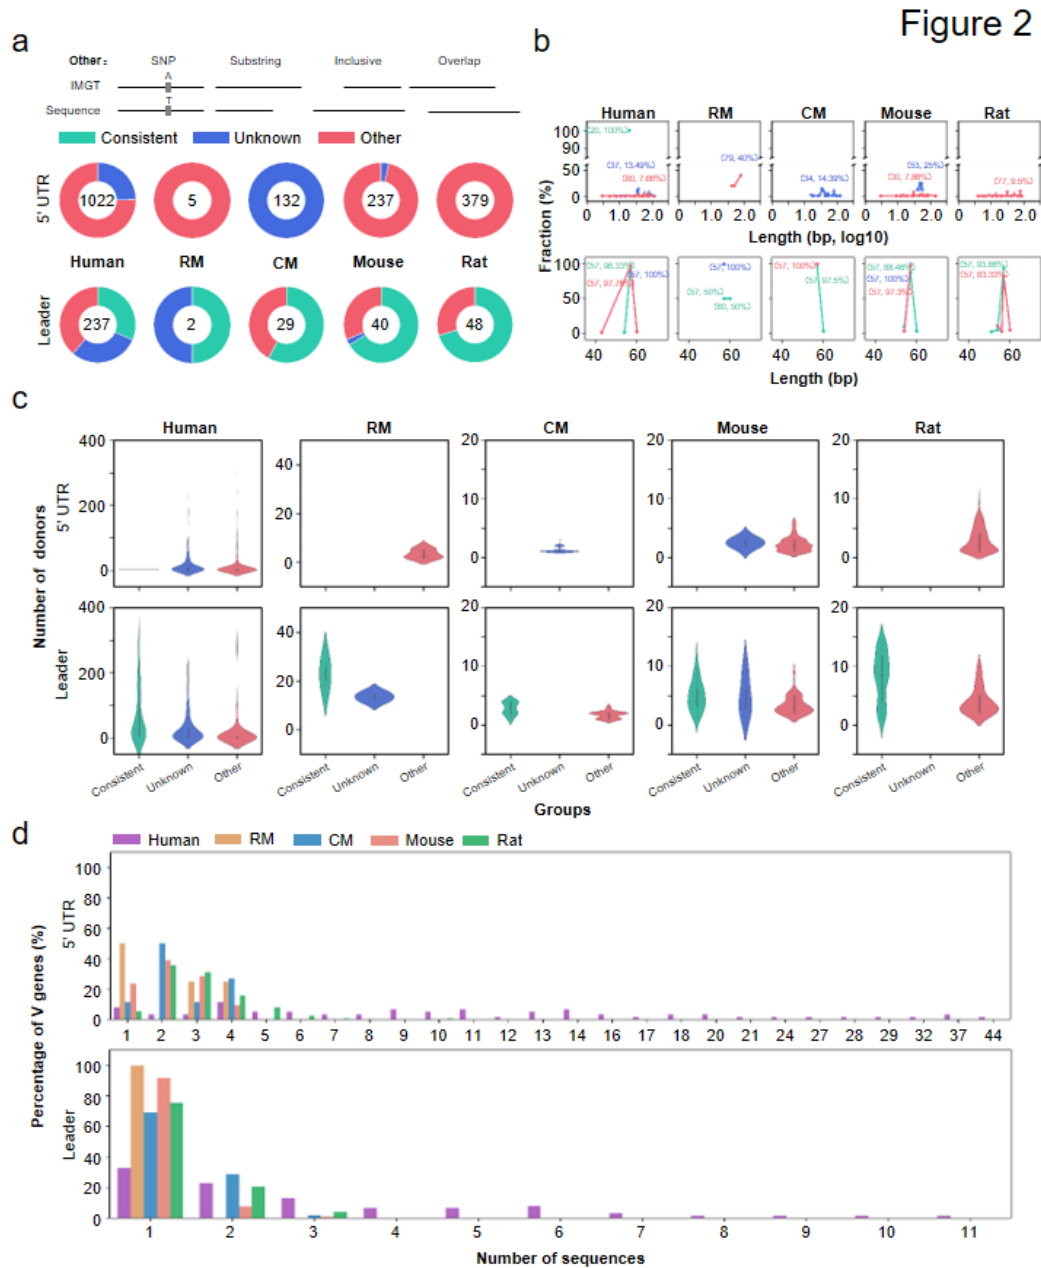

**Figure 2. Overview of the discovered AUs for heavy chain.** (a) The composition of discovered 5' UTR and leader sequences. "Consistent" indicates sequences identical to those curated by IMGT/GENE DB. "Unknown" indicates sequences whose corresponding alleles were not provided with available AUs. "Other" includes the rest four situations, which were illustrated on top of the donut charts. The number of novel sequences is marked in the center of each donut charts. (b) The length distribution of discovered 5' UTR and leader sequences. The length and its corresponding frequency were marked for each peak. (c) The distribution of the number of donors sharing a certain sequence. Different colors in (b) and (c) mean different groups and are consistent with those in (a). (d) Percentage of V genes as a function of the number of discovered 5' UTR and leader sequences.

134

### 135 The AUs coevolved with V genes

136 We further investigated the sequence-level similarities among AUs within and across

137 species (Materials and Methods). Within the same species, we found both 5' UTR and leaders

138 showed clear family-specific sequence feature for both heavy and light chains (Figure 3a, b and  
139 Supplementary figure 6, 7). For human heavy chains, leader sequence sharing was only observed  
140 for genes in the same family (Figure 3c, d and Supplementary figure 8). It is also the case for 5'  
141 UTR sequences for human light chains (Supplementary figure 8). However, a single 5' UTR  
142 sequence (ACC) was shared between VH1 (IGHV1-3, IGHV1-17 and IGHV1-69) and VH3  
143 (IGHV3-13) families (Figure 3c). This family wise sharing of 5' UTRs also exists in nonhuman  
144 species (Supplementary figure 9). Thus the AUSs, in general, are V gene family specific. Besides,  
145 these within-family interchangeable leaders would also affect the application of elevating V gene  
146 assignment accuracy by incorporating upstream sequences.

147 For each of the nonhuman V alleles, we identified its human counterpart by sequence  
148 similarity (Materials and Methods). Then we compared the similarities of nonhuman V gene  
149 elements to those of their human counterparts. The pairwise similarities for both 5' UTRs and  
150 leaders correlate with V allele similarities. This indicate the AUSs evolved together with V gene  
151 alleles (Figure 3e and Supplementary figure 10). Moreover, the correlations of leaders were higher  
152 than those of 5' UTRs. This result suggested that AUSs coevolved with V genes and the leaders  
153 and V genes were under more similar selective pressure. In details, we found that 5' UTR and  
154 leader sequences of RM (73.9% and 90.6% for heavy chain for 5' UTR and leader, respectively)  
155 and CM (68.4% and 87.8%) were more similar to human than mouse (44.5% and 62.2%) and rat  
156 (45.2% and 60.6%) (Figure 3f and Supplementary figure 11, Materials and Methods). This was  
157 consistent with the genomic distances reported before [28-31]. We previously classified heavy  
158 chain V genes into two groups, namely core genes and noncore genes<sup>31</sup>, where the former  
159 contributes to the vast majority of antibody repertoire and the latter is negligible. We then

160 classified the heavy chain V genes for four nonhuman species and calculated the sequence  
161 similarities between nonhuman and human for V genes, 5' UTRs, and leaders. Although noncore  
162 genes are more functionally inactive, they showed no significant differences in sequence similarity  
163 between human and nonhuman species, except for the V genes of mouse and rat (Figure 3f). This  
164 result indicated that core genes and noncore genes are of equal importance evolutionarily, despite  
165 their difference in contribution to antibody repertoire. Furthermore, we observed a roughly equal  
166 similarity between leaders and V genes, implicating again a coevolution between them.

Figure 3

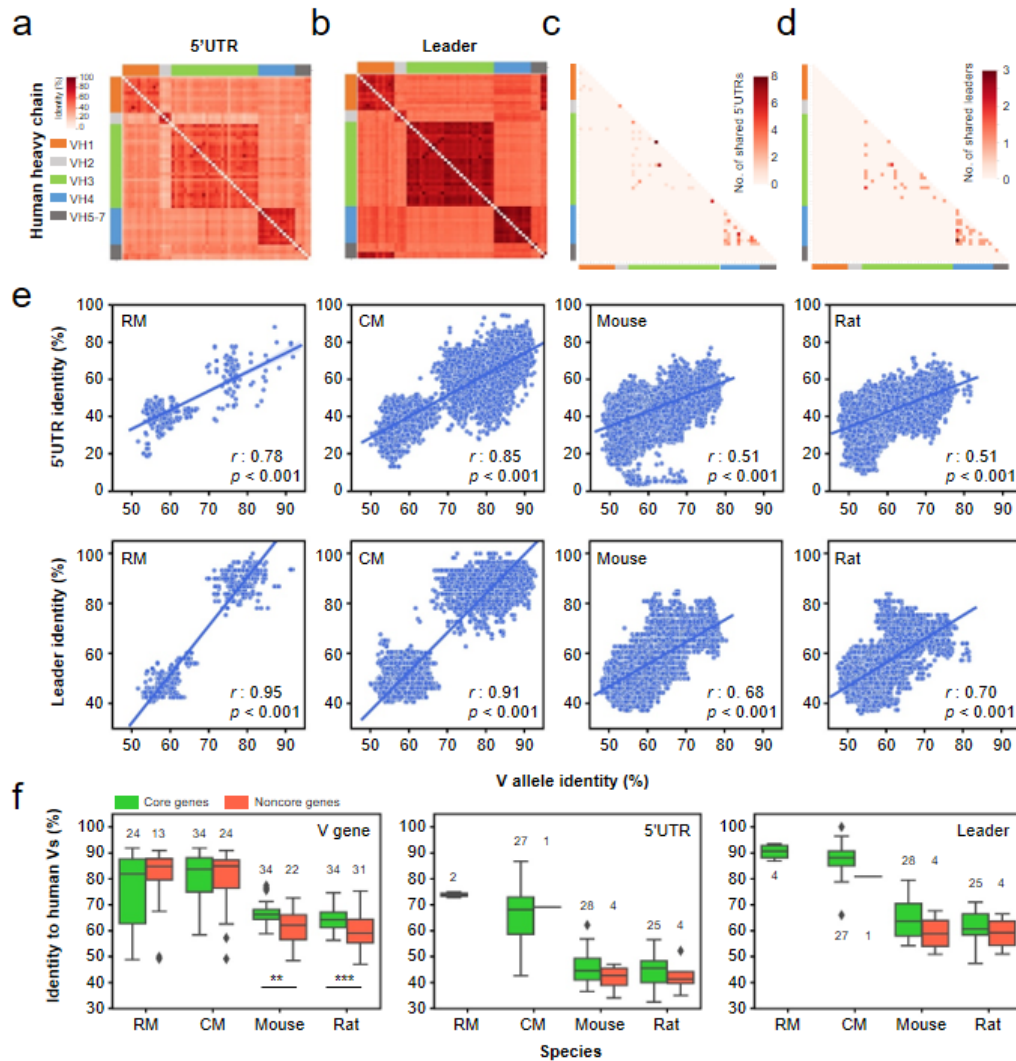

Figure 3. 5'UTR and leader sequence similarity within human and between species. (a) 5'UTR sequence identity between V genes. (b) Leader sequence identity between V genes. (c) The number of shared 5'UTR sequences between V genes of different families. (d) The number of shared leader sequences between V genes of different families. The side color bar indicates gene families. (e) The correlation between 5'UTR or leader sequence identities and V allele sequence identities in four nonhuman species. The line in each scatterplot represents the fitted linear regression model. (f) V gene, 5'UTR and leader sequence identity between human and nonhuman species for antibody heavy chain. Genes were classified into core genes and noncore genes according to Yang et al., 2019.  $r$ , Pearson's correlation coefficient;  $p$ , p value of the linear model; \*\*,  $p < 0.01$ ; \*\*\*,  $p < 0.001$ .

167

168 **Leader SNPs are position-dependent and may contribute to functional reversal and**  
169 **inefficient amplification of V genes**

170 We next examined the single nucleotide polymorphisms (SNPs) in the AUSs as they were  
171 reported to affect antibody production [16] and the primer design for Rep-Seq and genetic  
172 predisposition screening [13,24]. Applying a heuristic algorithm, we investigated the ratio of

173 replacement (R) to silent (S) SNPs and positional nucleotide and amino acid diversity index (NDI  
174 and ADI) of discovered leader sequences ([Materials and Methods](#)) except for RM due to the low  
175 number of SNPs. For heavy chain leaders, the R/S ratio of human was the lowest (0.43), which  
176 was followed by CM (0.63), mouse (2.66) and rat (4.05) ([Figure 4a](#)). Similar decreased R/S ratios  
177 were also observed in light chains ([Supplementary figure 12](#)). Knowing that each leader sequence  
178 contains a hydrophobic central region [16], we classified the amino acids according to their  
179 polarities and looked into the amino acid conversion types for replacement SNPs. It demonstrated  
180 that intra-group conversions dominated overall amino acid conversions ([Figure 4b and](#)  
181 [Supplementary figure 12](#)). And the percentage of inter-group conversions followed the same order  
182 as that of replacement SNPs in different species. Furthermore, both NDI and ADI were calculated  
183 to evaluate the positional nucleotide and amino acid diversity. The NDI profile exhibited distinct  
184 patterns ([Figure 4c](#)). To be specific, the third nucleotides in 2nd, 3rd, 9th, 12th and 19th codons in  
185 leader sequences possessed clearly higher NDI than the first two nucleotides in the same codons.  
186 Since the choice of the third nucleotides in a codon often do not change the encoded amino acids,  
187 the higher NDI of the third nucleotides demonstrated a clearly negative selection over the  
188 polymorphisms taking place in the first two nucleotides in these codons. In contrast, the 13th, 14th,  
189 16th, and 17th codons were observed with higher NDI in the first two nucleotides, suggesting the  
190 underlying positive selection. While for the 6th and 7th codons, the diversities were comparable  
191 among the constituent nucleotides. The positional ADI profile was consistent with NDI ([Figure](#)  
192 [4c](#)).

193 The SNPs in AUSs would also affect the antibody genotyping as well as Rep-Seq when these  
194 polymorphic regions were targeted by PCR primer design. We selected two representative primer

195 sequences from public resources that target either the 3' end (Primer 1) or 5' end (Primer 2) of  
196 leader sequences of IGHV1-24\*01. We found both of them covered the SNP loci (5 for primer 1  
197 and 2 for primer 2) (Figure 4d). To comprehensively evaluate the influence of novel leaders on  
198 antibody sequence amplification, we compared the novel leader sequences to 6 widely applied  
199 primer sets [24,32-36]. As a result, 9 to 22 genes were found with novel sequences more distant to  
200 the optimal primers than their counterpart in IMGT (Supplementary Table 3). Particularly, the  
201 number of mismatches can increase from 4 to 9 for IGHV1-17 in the primer set reported by Klein  
202 et al. [32] (Supplementary Table 4). Indeed, when comparing amplifications of V alleles between  
203 5'RACE and multiplex primers, the more mismatches in the primer, the less V allele were found  
204 in the repertoire (Figure 4e, Materials and Methods). More mismatches between primers and their  
205 targeted AUSs led to more compromised amplification. Therefore, the AUS set we reported here  
206 would be a valuable resource for later primer designs.

207 More importantly, the SNPs in the leader region also caused functional resurrection or silence  
208 to their corresponding genes. For instance, the human IGHV3-69-1\*01 and IGHV3-69-1\*02 were  
209 both annotated as pseudo genes at IMGT because of the missing initiation codons at the starts of  
210 leader sequences. However, we identified 2 (supported by 34 and 5 subjects) and 1 (3 subjects)  
211 novel leader sequences that possessed normal initiation codon (*AUG*) and thus made these alleles  
212 functional (Figure 4f and Supplementary figure 13a). This functional recurrence also happened in  
213 IGHV1-67\*01 of mouse (5 subjects) (Supplementary figure 13b). On the contrary, the SNP in the  
214 leader region caused early stop codon and silenced IGHV11-2\*01 in rat (2 subjects) (Figure 4g).  
215 Thus, the SNPs in the AUSs are important for the activation of downstream V genes and  
216 additional awareness should be paid in the future.

217

Figure 4

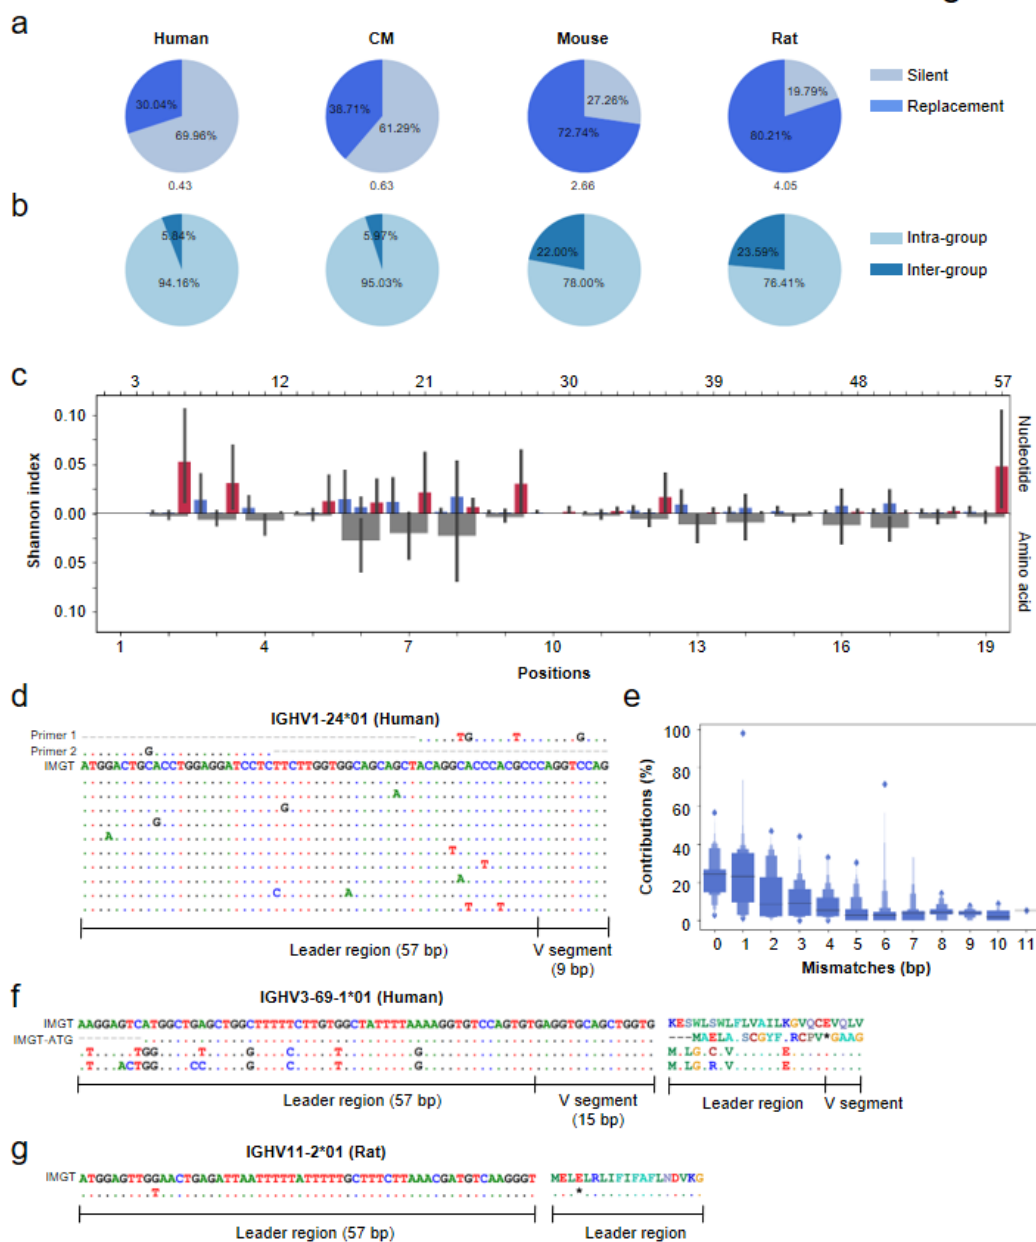

Figure 4. Characterization of SNPs observed in discovered leader sequences. (a) The percentage of silent (S) and replacement (R) SNPs for heavy chain. R/S ratio was marked beneath each pie plot. (b) The percentage of intra-group and inter-group amino acid conversion. Note that amino acids here were classified according to their polarities. (c) Positional nucleotide diversity profile of leader sequences. The vertical lines mean the standard errors. Boxes in red represent the third nucleotides in codons. (d) The schematic representation of mismatches of published primers with discovered leader sequences. (e) The correlation between the contribution to the overall target sequences and the number of their mismatches with primers. (f, g) Schematic representation of SNP-associated V gene functional reversals, including pseudo-to-functional (f) and functional-to-pseudo transitions (g).

218



219 **uAUGs and leader sequences do not affect antibody expression**

220 Upstream open reading frames (uORFs) or upstream AUGs (uAUGs) have been reported to  
221 exist in 44%-50.5% of human annotated transcripts, implicate longer 5' UTR sequences, and  
222 associate with significant reduction of downstream protein expression and modestly to markedly  
223 decreased mRNA level [14,18,37]. Having obtained 5' UTR sequences from hundreds of unique  
224 AUSs for human, we investigated the prevalence of uAUGs in antibody V genes and its  
225 correlation with gene expression.

226 We observed uAUGs in the 5' UTR of 12.4%, 11.85% and 8.70% of AUSs for human heavy,  
227 kappa and lambda chain, respectively (Table 2). Thus the uAUG frequency in antibody V genes is  
228 less than that in human mRNAs and the stochastic estimation, indicating the purifying selection  
229 [37,38]. Thus, this underrepresentation of uAUGs encoded in antibodies indicated that antibodies  
230 tend not to be subjected to this post-transcriptional regulation. We also observed a significant  
231 length difference between uAUG-containing and uAUG-absent 5' UTRs (Figure 5a). Notably,  
232 these differences did not fully agree with what was reported in previous studies. The antibody  
233 heavy chain 5' UTRs from human and CM demonstrated a reversed pattern, in which  
234 uAUG-containing 5' UTRs were even shorter. This result implied that a longer 5' UTR is not  
235 necessarily predisposed to contain uORFs and thus further address the polymorphism of  
236 post-transcriptional regulation for different antibody chains and for different species.

237 The high throughput Rep-Seq approach gives us access to the measurement of gene  
238 expression. We thus obtained the gene expression for each sample and correlated it with the  
239 number of uAUGs present in the 5' UTR sequences of their corresponding V genes. Two and four  
240 genes meeting the criteria were included in this analysis for human heavy and kappa chain,

241 respectively ([Materials and Methods](#)). Although varied mRNA level was observed in different  
242 uAUG number group, statistical analysis indicated the difference was not significant ( $p>0.5$ ,  
243 unpaired Student's t-test), except for a kappa gene - IGKV1-17 ([Figure 5b and Supplementary](#)  
244 [figure 14](#)). Together with the observation that the correlation was ambiguous (both seemingly  
245 positive and negative correlation were obtained), we believed that the influence of uAUGs on  
246 antibody expression, if any, is not critical. It is noteworthy that 21 of 23 heavy chain V genes with  
247 which we observed uAUGs are core genes which are prevalent in the repertoire [39]  
248 ([Supplementary figure 15](#)). As half of the heavy chain V genes are noncore genes that express very  
249 lowly in the repertoire, the uAUGs in these genes might be unrevealed in this study.

250       Apart from uORFs, the leader sequence itself was also found to associate with mRNA  
251 expressions [15,20]. To validate whether and to what extent leader sequences affect antibody  
252 transcription, we set off to investigate the antibody expression of V genes sharing two or more  
253 unique leaders. As shown in [Figure 5c and Supplementary figure 16](#), the overall pattern showed no  
254 significant leader-specific gene expression was found. Thus the leader sequences involve more in  
255 the regulation of translation rather than transcription. Altogether, the results above reflected the  
256 polymorphism of antibody 5' UTR sequences across species and chains and the trivial functional  
257 relevance to gene expression of uORFs and leader sequences.

Figure 5

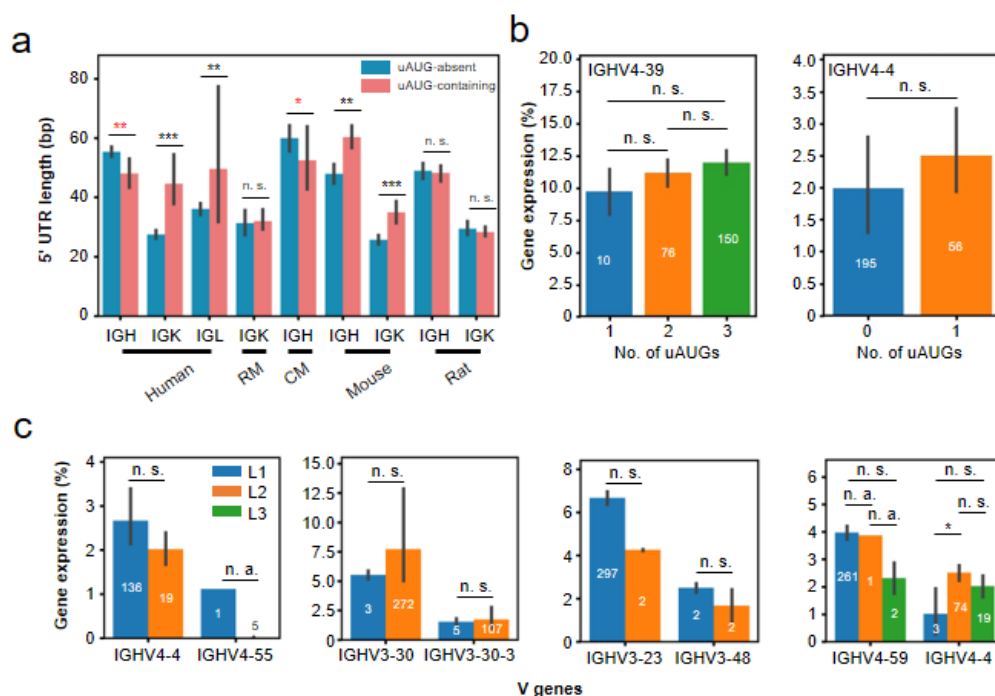

**Figure 5. Functional relevance of uAUGs and leader sequences to gene expression.** (a) The 5' UTR length comparison between uAUG-containing group and uAUG-absent group in different species. The red asterisks marked the chains with reversed length difference between two groups. (b) The functional relevance of the number of uAUGs in 5' UTR sequences to gene expression for human heavy chain V genes. (c) The functional relevance of leader sequences to gene expression for human heavy chain V genes. L1, L2, and L3 represent unique leader sequences. The L1 and L2 in different subplots are not necessarily the same. The number in the center of or on top of each bar mean the number of samples in each group. The vertical lines mean the standard errors. n. a. not available; n. s., not significant ( $p > 0.5$ ); \*,  $p < 0.05$ ; \*\*,  $p < 0.01$ ; \*\*\*,  $p < 0.001$ .

258

## 259 Discussion

260 Rep-Seq has provided an avenue by which researchers are able to investigate antibodies with  
 261 an unprecedented depth [5]. Taking advantage of Rep-Seq, we investigated the polymorphisms  
 262 existing in the AUSs of both heavy chain and light chain V genes from five species. We designed a  
 263 bioinformatic pipeline and captured 2,957 unique AUSs, of which 875 (29.6%) are novel (as to  
 264 leader). We demonstrated that the SNPs in the AUSs affect the PCR amplification efficiency and  
 265 thus the subsequent antibody quantification. Therefore, our findings are of importance for  
 266 antibody gene genotyping, antibody quantifications with traditional PCR method and

267 high-throughput Rep-Seq. Moreover, the novel AUSs revealed in this study also provide a  
268 resource for antibody engineering and aid antibody studies in the molecular level.

269 In-depth analyses showed that leader sequences are family-specific and are more conserved  
270 than 5' UTR. The distance of the AUS between human and other nonhuman species are  
271 reminiscent of that observed in genome level. And the sequence similarities between human and  
272 nonhuman species also indicates a synchronous evolution between leaders and their downstream  
273 V genes.

274 Notably, we found a 5' UTR sequence was shared by V genes of different families. The  
275 length of the associated 5' UTR was only 3 bp. It was unlikely to be the result of RNA degradation  
276 during library preparation, because the 5' cap is required for a successful template switch when  
277 using 5'RACE protocol [40]. Moreover, we found the 5' UTR for IGHV1-17\*02 in 6 subjects, a  
278 strong evidence for its authenticity. Previous studies reported a single-nucleotide 5' UTR is  
279 enough for the initiation of translation in vitro [41]. Therefore, the short 5' UTR may not mean the  
280 functional abnormality. However, short 5' UTRs were found to impact the translation efficiency  
281 [41]. Due to the unavailability of proteomic data, we were not able to investigate its translation  
282 efficiency.

283 Informed by previous reports that uAUGs and leader sequence have an effect on gene  
284 expression in other context [4,15,18,19], we also examined if there exists correlations between  
285 them in antibody genes. We showed little evidence to support the link between them, which means  
286 for antibodies the AUSs primarily dictate the translation process. Noteworthy is that we  
287 investigated the correlations only in human, partly because we have no enough samples for  
288 nonhuman species. The other reason, however, is that there are a limited number of germline

289 reference available [7-9]. Even worse is that some germline reference provided by  
290 IMGT/GENE-DB are provisional because their genomic locations has not been determined [26].  
291 Hence, we proposed that the germline sequences of immunoglobulin loci should be thoroughly  
292 characterized in these species. The accurate antibody probing in these model organisms are  
293 supposed to boost the understanding of antibody repertoire in human.

294 In addition to the little quantitative impact on gene expression, we also observed that the  
295 SNPs in leader sequences could reverse the functional status of their downstream genes. It  
296 addressed importance of dissecting the AUSs in the evaluation of antibody functionalities, because  
297 a functional gene in a typical individual or ethnic group may be nonfunctional in another and *vice*  
298 *versa*. However, the prevalence of such SNP-associated functional recurrences or silences,  
299 together with their consequence for the antibody repertoire, remains to be determined. Another  
300 interesting phenomenon we observed is the higher R/S ratio in leader region for mouse and rat  
301 than human and CM. Moreover, the percentage of inter-group amino acid conversion was also  
302 higher for the two rodents. It is possibly because the immunoglobulin loci are less essential for the  
303 survival of rodents and thus they can tolerate more functional consequence caused by inter-group  
304 amino acid conversions [42].

305 In summary, we provided for the first time the most comprehensive knowledge database for  
306 AUSs for both human and other model organisms. Together with the characterization of these  
307 sequences, the AUS set discovered in this study will serve as valuable resources for fundamental  
308 studies and antibody engineering as well.  
309

## 310 **Funding**

311 This study was supported by the National Natural Science Foundation of China (NSFC)  
312 (31771479) (Z. Z.), NSFC Projects of International Cooperation and Exchanges of NSFC  
313 (61661146004), and the Local Innovative and Research Teams Project of Guangdong Pearl River  
314 Talents Program (2017BT01S131).

## 315 **Author Contributions**

316 Y. Z., X. Y., J. W., S. C., Y. C., and C. L. analyzed the data. H. T., Q. W., J. G., W. X., and M. W.  
317 conducted the biological experiment. C. L. coordinated the project. Y. Z., X. Y., J. W., H. T., L. W.,  
318 C. S., and Z. Z. wrote the manuscript. Z. Z. conceived the project.

## 319 **Competing of interests**

320 The authors declared no competing financial interests.

## 321 **Materials and Methods**

### 322 **Subjects and sample preparation**

323 In this study, we included a total number of 782 samples from five species, including human  
324 (n=728), RM (*Macaca mulatta*) (n=27), CM (*Macaca fascicularis*) (n=2), mouse (*Mus musculus*)  
325 (n=11), and rat (*Rattus norvegicus*) (n=14). Twenty-one and twenty-six samples are from public  
326 resources for human and RM, respectively. And their accession numbers in NCBI Sequence Read  
327 Archive are provided as [Supplementary Table 5](#). The in-house human samples were prepared as

328 described previously [39]. As for samples from nonhuman species, EDTA-treated blood specimens  
329 were collected from sixteen animals (seven rats, six mice, two CMs, and an RM). Peripheral blood  
330 mononuclear cells (PBMCs) were isolated by Ficoll-Paque density centrifugation. The PBMCs  
331 were subjected to total RNA extraction using the RNeasy Mini Kit (Qiagen, 74106), according to  
332 the manufacturer's protocol. This protocol was approved by the Ethics Committee of Southern  
333 Medical University.

### 334 **Library preparation and high throughput sequencing**

335 Total RNA was used as a template to synthesize cDNA, using a SMARTer RACE (Rapid  
336 Amplification of cDNA Ends) cDNA Amplification Kit (Clontech, 634928), according to the  
337 manufacturer's protocol. Following cDNA synthesis, 10% of the volume of cDNA was subjected  
338 to VH amplification in a 25  $\mu$ l PCR reaction using the Kapa HiFi HotStart Ready Mix (KAPA  
339 Biosystems, kk2602) with universal or VH-family specific forward primers and the corresponding  
340 reverse primers ([Supplementary Table 6](#)). The thermal cycling conditions were programmed as  
341 follows: 95 °C for 3 min; 30 cycles of 98 °C for 20 s, 60 °C for 15 s, and 72 °C for 15 s; 72 °C  
342 for 5 min. PCR products were purified using the Nucleospin Gel & PCR Clean-up kit  
343 (Macherey-Nagel, 704609.25). DNA concentration was detected using the Qubit 4.0 fluorometer  
344 (ThermoFisher Scientific). Two hundred nanograms of each gel-purified product was subjected to  
345 library preparation, followed by sequencing by Illumina platform (MiSeq PE300 and NovaSeq  
346 PE250).

### 347 **Extraction of AUSs and delimitation of 5' UTR and leader region**

348 The Six steps we employed to identify qualified AUSs were briefly described in the Result  
349 section and demonstrated as [Figure 1](#). Here we provided a more detailed implementation of these

350 steps.

351 i) V allele variant detection. Considering the uncaptured polymorphisms in  
352 immunoglobulin loci in mammalian, especially for nonhuman species, we started with  
353 the identification of novel alleles for all enrolled samples and species [9,43,44]. We  
354 executed three iterations of IgDiscover (v0.12.3) based on an initial species-specific V  
355 gene database obtained from IMGT/GENE-DB (update: 06 July 2020) [7,26]. To enroll  
356 as many as possible the initial germline sequences, we included all sequences from the  
357 F+ORF+all P directory. The full set of germline reference was then subjected to a  
358 deduplication process before serving as the starting database. After the detection, all  
359 discovered novel alleles were merged with the initial ones for downstream sequence  
360 annotation.

361 ii) Sequence annotation and assembly. We then proceeded with the functionalities provided  
362 by MiXCR (v3.0.7) [45]. Taking advantage of the subcommand *align* and *assemble* and  
363 their exportation counterparts, we obtained both the sequence annotation (*alignments.txt*)  
364 and clustering (*clones.txt*) results. Sequences with the same V alleles, J alleles, and  
365 CDR3 nucleotide sequences were assembled into clonotypes. The commands we used to  
366 annotate and assemble sequences with MiXCR (v3.0.7) are as below,

367 Alignment:

```
368 mixcr align --species $species -f --library $species.specific.library $read1 $read2  
369 alignments.vdjca
```

370 Assembly:

```
371 mixcr assemble -f -a -OseparateByV=true -OseparateByJ=true alignments.vdjca
```



372 *clones.clna*

373 Exportation:

374 *mixcr exportAlignments -f -readIds -cloneId -vHit -vAlignment -targetSequences*

375 *clones.clna alignments.txt*

376 *mixcr exportClones -f --chains \$CHAIN clones.clna clones.txt*

377 iii) Genotyping. To guide the AUS discovery, the genotype was predetermined based on

378 allele usage for each V gene. In this study, we considered for each V gene two scenarios,

379 homozygous and heterozygous. Theoretically, if a gene is heterozygous in a typical

380 sample, each of the two variants will possess a unique AUS. Otherwise, the only variant

381 of a homozygote will probably link with two unique AUSs. We determined the genotype

382 through the Bayesian method employed in TIgGER [46], except that we considered only

383 two scenarios aforementioned. In this case,  $\vec{\pi}_{H_H} = (1, 0)$  and  $\vec{\pi}_{H_D} = (0.6, 0.4)$ . Other

384 parameters for the proposed Bayesian model were unchanged. The allele usage,

385 measured as the number of clonotypes recombined from a typical allele, served as the

386 input of this function.

387 iv) Identification of consensus sequences within clonotypes. Each AUS is deemed to start at

388 a position immediately downstream the rGrGrGs in the 3' end of RACE primer and end

389 at the exclusively initial base of the associated V gene segment. For each clonotype, we

390 extracted a list of valid AUSs and determined the most frequent one as the consensus

391 AUS. For reliability, we discarded the consensus sequences representing no more than 50%

392 of the AUSs within clonotypes. We also required the initiation codon – “AUG” – is

393 contained in the AUS to precisely delimit 5' UTR and leader region. For AU Ss with

394 multiple AUGs, we selected an optimal AUG as the start position of leaders. Each  
395 optimal AUG corresponds to a leader sequence with its length nearest to a predetermined  
396 optimal leader length. The optimal leader length for each allele is same as the length of  
397 leader sequence provided by IMG T provided it is known. Otherwise, it is same as the  
398 most frequent leader length of all other alleles corresponding to the same gene, family or  
399 all the rest alleles with known leader sequences. Noted that we extracted only leader  
400 sequences for samples from BioProject PRJNA503527 for their UTRs were found to be  
401 incomplete. The extracted leader sequences were then subjected to the same pipeline as  
402 AUSs.

403 v) Identification of consensus sequences within V alleles. The definition of clonotype  
404 ensured that each of consensus sequences is associated with a unique V allele. AUSs  
405 corresponding to alleles not present in the genotype list were discarded at the first place.  
406 Then we collapsed the consensus sequences belonging to the same alleles and kept the  
407 most frequent ones. Alleles with no more than 10 available AUSs were excluded. For  
408 each allele in the genotype list, we retained also the second most frequent AUSs to  
409 account for the underlying diversity in the upstream region, providing the corresponding  
410 gene is a homozygote and the most frequent one takes up less than 87.5% of total AUSs  
411 [8].

412 vi) Score-based filtration. For each chain of a typical species, the candidate AUSs for all  
413 samples were pooled together and then classified into two groups according to prior  
414 knowledge. The group containing known leader sequences were regarded as *bona fide*  
415 and thus serve as the positive control. The other group, comprised of novel sequences,

416 will be subject to a score-based filtration. The score scheme takes into account four  
 417 features for each candidate sequence, namely the absolute number of supportive reads,  
 418 clones and donors and the similarity to known sequences. The weight assigned to them  
 419 were 20, 20, 30, and 30, respectively. The independent scores ( $S_{read}$ ,  $S_{clone}$ ,  $S_{donor}$  and  
 420  $S_{similarity}$ ) and total score ( $S_{total}$ ) were calculated as the formulas below,

$$S_{read} = \begin{cases} 20 \times \sqrt{\frac{n_r}{N_{rmedian}}} & (n_r < N_{rmedian}) \\ 20 & (n_r \geq N_{rmedian}) \end{cases} \quad (i)$$

$$S_{clone} = \begin{cases} 20 \times \sqrt{\frac{n_c}{N_{cmedian}}} & (n_c < N_{cmedian}) \\ 20 & (n_c \geq N_{cmedian}) \end{cases} \quad (ii)$$

$$S_{donor} = 30 \times (1 - 1/(n_d + 1)) \quad (iii)$$

$$S_{similarity} = 30 \times s \quad (iv)$$

$$S_{total} = S_{read} + S_{clone} + S_{donor} + S_{similarity} \quad (v)$$

421  
 422 Note,  $N_{rmedian}$  and  $N_{cmedian}$  mean the median number of supportive reads and clones for  
 423 known AUSs that serve as positive control while  $n_r$ ,  $n_c$ , and  $n_d$  mean the number of  
 424 supportive reads, clones, and donors for novel AUSs.  $S$  represents the identity to known  
 425 leader sequences for the leader region in each AUS. If no known leader sequence was  
 426 provided by IMGT/GENE-DB for the corresponding allele, an average identity to the  
 427 leaders of all other alleles corresponding to the same gene or the same family or of all the  
 428 rest alleles with known leader sequences was calculated to represent the identity. Thus,  
 429 the theoretical maximum score for an AUS is less than 100. After the  $S_{total}$  were  
 430 calculated for each AUS, the novel sequences with a score less than the median  $S_{total}$  of

431 positive control were discarded and the rest novel sequences together with positive  
432 control serve as the final AUS library. The score-based filtration step was applied to each  
433 chain of each species independently. An exception was with the filtration of AUSs for the  
434 kappa chain of RM. Since no known complete leader sequences were discovered, the  
435 AUSs containing the known partial leader sequences were regarded as the positive  
436 control for filtration.

#### 437 **The calculation of the number of unique AUS, 5' UTR, and leader sequences**

438 The number of unique AUS, 5' UTR, and leader sequences is calculated as the number of  
439 unique combinations of V allele and AUS, 5' UTR, and leader sequences. The AUSs containing  
440 only leader sequences (n=4) identified from RM samples under BioProject PRJNA503527 were  
441 not included in this analysis, but instead were included in all other analyses.

#### 442 **Sequence similarity comparison**

443 Sequence similarity or identity is calculated based on the pairwise alignment result. The  
444 pairwise alignment was implemented using *pairwise2* function built in Biopython (v1.70). After  
445 the pairwise alignment result was obtained, we calculated the sequence similarity as the number of  
446 matched nucleotides divided by the alignment length. For the measurement of leader or 5' UTR  
447 sequence similarity between two genes within the same species, we performed an all-to-all  
448 comparison between all leader sequences corresponding to the two compared genes and calculated  
449 an average similarity for each gene pair. While for the sequence comparison between genes from  
450 human and nonhuman species, we determined the homologous genes at first. The homologous  
451 gene in human for each allele of nonhuman species was determined by the sequence similarity and  
452 the gene corresponding to the nearest allele in human was considered as its homologous gene. In

453 this case, a typical gene in nonhuman species can have alleles with different homologous genes in  
454 human. Thus a gene in nonhuman species can be homologous with multiple genes in human and  
455 vice versa.

#### 456 **Evaluation of functional relevance of uAUGs and leader sequence to gene expression**

457 The functional relevance of uAUGs and leader sequence to gene expression was investigated  
458 in only human samples due to the limitation of sample size. To avoid the noise caused by  
459 heterozygous 5' UTR for a gene, only genes with one unique 5' UTR sequence were considered in  
460 each sample. Besides, among samples, only genes with diversity in the number of uAUGs and  
461 having at least 5 samples in each group were finally included in the analysis. Applying these  
462 criteria to all genes, we discovered 2 and 4 genes for heavy and light chain, respectively ([Figure](#)  
463 [5b and Supplementary figure 14](#)). The gene filtration criteria for the evaluation of leader  
464 sequences' influence on gene expression is similar. In each sample, only genes with one unique  
465 leader sequence were retained. Besides, among samples, only genes with at least two kinds of  
466 leader sequences and shared at least two leader sequences with another were finally included. The  
467 gene expression in each sample is calculated as the number of antibody sequences assigned a  
468 typical gene divided by the number of all assigned antibody sequences.

#### 469 **The measurement of percentage of replacement and silent SNPs**

470 Owing to the limited number of discovered leader sequence, we did not include RM into this  
471 analysis. To measure the percentage of replacement and silent SNPs, the SNP loci were firstly  
472 determined by aligning leader sequences from the same genes and then identifying the  
473 polymorphic positions. For heavy chain and lambda chain, only leader sequences of 57 bp were  
474 considered, while for kappa chain only 60 bp. This length limitation makes the leader sequence

475 alignment quite straightforward and at the same time retain the overwhelming majority of leader  
476 diversity (Figure 2b). Then the SNP loci-associated codons were identified. For each SNP  
477 loci-associated codon position (e. g. from 1 to 19 for heavy chain), the frequencies of different  
478 codons were calculated. Each pair of codons will associate with a single SNP outcome, either  
479 replacement or silent. Then for a certain codon position, its contribution to silent SNPs was  
480 calculated as the sum of the product of the two frequencies for all codon pairs encoding the same  
481 amino acids. Similarly, its contribution to replacement SNPs was calculated as the sum of the  
482 product of the two frequencies for all codon pairs encoding different amino acids. Finally, the total  
483 replacement or silent SNPs were the sums of the contributions of all SNP loci-associated codon  
484 positions. The percentages of two kinds of amino acid conversion, namely intra-group conversion  
485 and inter-group conversion, were determined in the same way, except that it considered only  
486 replacement SNPs.

#### 487 **Nucleotide and amino acid diversity index (NDI and ADI) calculation**

488 Only SNPs of human heavy chain leader were included in this analysis. We used NDI (or  
489 ADI) to measure the nucleotide (or amino acid) diversity of each position. The diversity index was  
490 supposed to reflect the conservation of each position in the leader. Both NDI (57 positions) and  
491 ADI (19 positions) were based on the formula calculating Shannon index as follows:

$$H' = - \sum_{i=1}^S p_i \ln p_i$$

492 where  $S$  represents the number of unique nucleotides or amino acids in a certain position and  $p_i$   
493 represents the proportion of  $i$ th nucleotide or amino acid.

#### 494 **Mismatch comparison between known and novel leaders**

495 In total 6 widely applied primer sets were included to compare the number of mismatches  
496 between primers and known leaders in IMGT/GENE-DB with that between primers and novel  
497 leaders found in this study. Therefore, the comparison considered only V alleles with both  
498 discovered novel leaders and their complete counterparts in IMGT/GENE-DB. For each leader  
499 sequence, we determined its optimal primer as well as the target region in each primer set by  
500 pairwise alignment. This process also enables us to obtain the number of mismatches with its  
501 optimal primer. In this way, a maximum number of mismatches with optimal primers can be  
502 obtained for each V gene ([Supplementary Table 4](#)).

#### 503 **Evaluation of primer amplification efficiency**

504 Two amplification strategies (5'RACE and multiplex PCR) were applied to the same sample  
505 and the paired sequencing dataset were acquired using NovaSeq 6000 sequencing system. We  
506 genotyped and extracted the AUSs together with the starting 30 bp sequence of V alleles for the  
507 sequenced sample using the RACE-derived dataset. For the multiplex-derived dataset, we also  
508 employed MiXCR to annotate the antibody sequences. The antibody sequences assigned to V  
509 alleles absent in the genotype were excluded at first. Then the contribution of each primer to one  
510 of its target V alleles was measured as this V allele's percentage of all the sequences targeted by  
511 this primer. It is also straightforward to calculate the mismatches between the primer and its target  
512 V alleles based on the AUSs and partial sequences of V alleles. When correlating the contributions  
513 with mismatches, we found a clear negative correlation between them ([Figure 4e](#)).

#### 514 **Software**

515 In-house scripts were written in Python (v3.7.4) employing modules including numpy

516 (v1.16.4), Biopython (v1.73), Levenshtein (v0.12.0) and pandas (v0.24.2). To visualize these  
517 results, we employed modules seaborn (v0.9.1) and matplotlib (v3.0.2) as well as a standalone  
518 software, BioEdit Sequence Alignment Editor.  
519

## 520 **References**

- 521 1. Forthal DN. Functions of Antibodies. *Microbiology spectrum* 2014;2:1-17
- 522 2. Boyd SD, Marshall EL, Merker JD, et al. Measurement and clinical monitoring of human  
523 lymphocyte clonality by massively parallel VDJ pyrosequencing. *SCI TRANSL MED*  
524 2009;1:12r-23r
- 525 3. Campbell PJ, Pleasance ED, Stephens PJ, et al. Subclonal phylogenetic structures in cancer  
526 revealed by ultra-deep sequencing. *Proc Natl Acad Sci U S A* 2008;105:13081-13086
- 527 4. Weinstein JA, Jiang N, White RR, Fisher DS, Quake SR. High-throughput sequencing of the  
528 zebrafish antibody repertoire. *SCIENCE* 2009;324:807-810
- 529 5. Georgiou G, Ippolito GC, Beausang J, et al. The promise and challenge of high-throughput  
530 sequencing of the antibody repertoire. *NAT BIOTECHNOL* 2014;32:158-168
- 531 6. Zhang Y, Xu Q, Zeng H, et al. SARS-Cov-2-, HIV-1-, Ebola-neutralizing and anti-PD1  
532 clones are predisposed. *bioRxiv* 2020
- 533 7. Corcoran MM, Phad GE, Bernat NV, et al. Production of individualized V gene databases  
534 reveals high levels of immunoglobulin genetic diversity. *NAT COMMUN* 2016;7
- 535 8. Gadala-Maria D, Yaari G, Uduman M, Kleinstein SH. Automated analysis of high-throughput  
536 B-cell sequencing data reveals a high frequency of novel immunoglobulin V gene segment alleles.



- 537 Proceedings of the National Academy of Sciences 2015;112:E862-E870
- 538 9. Ralph DK, Matsen FA. Per-sample immunoglobulin germline inference from B cell receptor  
539 deep sequencing data. PLOS COMPUT BIOL 2019;15:e1007133
- 540 10. Glanville J, Kuo TC, von Budingen HC, et al. Naive antibody gene-segment frequencies are  
541 heritable and unaltered by chronic lymphocyte ablation. Proc Natl Acad Sci U S A  
542 2011;108:20066-20071
- 543 11. Lingwood D, McTamney PM, Yassine HM, et al. Structural and genetic basis for  
544 development of broadly neutralizing influenza antibodies. NATURE 2012;489:566-570
- 545 12. Parks T, Mirabel MM, Kado J, et al. Association between a common immunoglobulin heavy  
546 chain allele and rheumatic heart disease risk in Oceania. NAT COMMUN 2017;8
- 547 13. Watson CT, Glanville J, Marasco WA. The Individual and Population Genetics of Antibody  
548 Immunity. TRENDS IMMUNOL 2017;38:459-470
- 549 14. Calvo SE, Pagliarini DJ, Mootha VK. Upstream open reading frames cause widespread  
550 reduction of protein expression and are polymorphic among humans. Proc Natl Acad Sci U S A  
551 2009;106:7507-7512
- 552 15. Elfakess R, Dikstein R. A translation initiation element specific to mRNAs with very short  
553 5'UTR that also regulates transcription. PLOS ONE 2008;3:e3094
- 554 16. Haryadi R, Ho S, Kok YJ, et al. Optimization of Heavy Chain and Light Chain Signal  
555 Peptides for High Level Expression of Therapeutic Antibodies in CHO Cells. PLOS ONE  
556 2015;10:e116878
- 557 17. Lovett PS, Rogers EJ. Ribosome regulation by the nascent peptide. Microbiol Rev  
558 1996;60:366-385

- 559 18. Matsui M, Yachie N, Okada Y, Saito R, Tomita M. Bioinformatic analysis of  
560 post-transcriptional regulation by uORF in human and mouse. *FEBS LETT* 2007;581:4184-4188
- 561 19. Vilela C, McCarthy JEG. Regulation of fungal gene expression via short open reading frames  
562 in the mRNA 5' untranslated region. *MOL MICROBIOL* 2003;49:859-867
- 563 20. Wellensiek BP, Larsen AC, Flores J, Jacobs BL, Chaput JC. A leader sequence capable of  
564 enhancing RNA expression and protein synthesis in mammalian cells. *PROTEIN SCI*  
565 2013;22:1392-1398
- 566 21. Zhou Y, Liu P, Gan Y, et al. Enhancing full-length antibody production by signal peptide  
567 engineering. *MICROB CELL FACT* 2016;15
- 568 22. Gibson SJ, Bond NJ, Milne S, et al. N-terminal or signal peptide sequence engineering  
569 prevents truncation of human monoclonal antibody light chains. *BIOTECHNOL BIOENG*  
570 2017;114:1970-1977
- 571 23. Khan TA, Friedensohn S, Gorter DVA, et al. Accurate and predictive antibody repertoire  
572 profiling by molecular amplification fingerprinting. *SCI ADV* 2016;2:e1501371
- 573 24. Kreer C, Döring M, Lehnen N, et al. openPrimeR for multiplex amplification of highly  
574 diverse templates. *J IMMUNOL METHODS* 2020;480:112752
- 575 25. Mikocziova I, Gidoni M, Lindeman I, et al. Polymorphisms in human immunoglobulin heavy  
576 chain variable genes and their upstream regions. *NUCLEIC ACIDS RES* 2020;48:5499-5510
- 577 26. Giudicelli V. IMGT/GENE-DB: a comprehensive database for human and mouse  
578 immunoglobulin and T cell receptor genes. *NUCLEIC ACIDS RES* 2004;33:D256-D261
- 579 27. Zhang Y, Yang X, Zhang Y, et al. Tools for fundamental analysis functions of TCR repertoires:  
580 a systematic comparison. *BRIEF BIOINFORM* 2019

- 581 28. Ebeling M, Kung E, See A, et al. Genome-based analysis of the nonhuman primate *Macaca*  
582 *fascicularis* as a model for drug safety assessment. *GENOME RES* 2011;21:1746-1756
- 583 29. Gibbs RA, Rogers J, Katze MG, et al. Evolutionary and biomedical insights from the rhesus  
584 macaque genome. *SCIENCE* 2007;316:222-234
- 585 30. Gibbs RA, Weinstock GM, Metzker ML, et al. Genome sequence of the Brown Norway rat  
586 yields insights into mammalian evolution. *NATURE* 2004;428:493-521
- 587 31. Waterston RH, Lindblad-Toh K, Birney E, et al. Initial sequencing and comparative analysis  
588 of the mouse genome. *NATURE* 2002;420:520-562
- 589 32. Klein F, Gaebler C, Mouquet H, et al. Broad neutralization by a combination of antibodies  
590 recognizing the CD4 binding site and a new conformational epitope on the HIV-1 envelope  
591 protein. *The Journal of Experimental Medicine* 2012;209:1469-1479
- 592 33. Meng W, Zhang B, Schwartz GW, et al. An atlas of B-cell clonal distribution in the human  
593 body. *NAT BIOTECHNOL* 2017;35:879-884
- 594 34. Scheid JF, Mouquet H, Ueberheide B, et al. Sequence and structural convergence of broad  
595 and potent HIV antibodies that mimic CD4 binding. *SCIENCE* 2011;333:1633-1637
- 596 35. Tiller T, Meffre E, Yurasov S, et al. Efficient generation of monoclonal antibodies from single  
597 human B cells by single cell RT-PCR and expression vector cloning. *J IMMUNOL METHODS*  
598 2008;329:112-124
- 599 36. Vergani S, Korsunsky I, Mazzarello AN, et al. Novel Method for High-Throughput  
600 Full-Length IGHV-D-J Sequencing of the Immune Repertoire from Bulk B-Cells with Single-Cell  
601 Resolution. *FRONT IMMUNOL* 2017;8
- 602 37. Iacono M, Mignone F, Pesole G. uAUG and uORFs in human and rodent 5' untranslated

- 603 mRNAs. *GENE* 2005;349:97-105
- 604 38. Neafsey DE, Galagan JE. Dual Modes of Natural Selection on Upstream Open Reading  
605 Frames. *MOL BIOL EVOL* 2007;24:1744-1751
- 606 39. Yang X, Wang M, Shi D, et al. Large-scale Analysis of 2,152 dataset reveals key features of  
607 B cell biology and the antibody repertoire. *bioRxiv* 2019
- 608 40. Harbers M, Kato S, de Hoon M, et al. Comparison of RNA- or LNA-hybrid oligonucleotides  
609 in template-switching reactions for high-speed sequencing library preparation. *BMC GENOMICS*  
610 2013;14:665
- 611 41. Hughes MJG, Andrews DW. A single nucleotide is a sufficient 5' untranslated region for  
612 translation in an eukaryotic in vitro system. *FEBS LETT* 1997;414:19-22
- 613 42. Liao B, Zhang J. Null Mutations in Human and Mouse Orthologs Frequently Result in  
614 Different Phenotypes. *Proceedings of the National Academy of Sciences - PNAS*  
615 2008;105:6987-6992
- 616 43. Frost SDW, Murrell B, Hossain ASMM, Silverman GJ, Pond SLK. Assigning and visualizing  
617 germline genes in antibody repertoires. *Philosophical Transactions of the Royal Society B:*  
618 *Biological Sciences* 2015;370:20140240
- 619 44. Zhang W, Li X, Wang L, et al. Identification of Variable and Joining Germline Genes and  
620 Alleles for Rhesus Macaque from B Cell Receptor Repertoires. *J IMMUNOL*  
621 2019;202:1612-1622
- 622 45. Bolotin DA, Poslavsky S, Mitrophanov I, et al. MiXCR: software for comprehensive  
623 adaptive immunity profiling. *NAT METHODS* 2015;12:380-381
- 624 46. Gadala-Maria D, Gidoni M, Marquez S, et al. Identification of Subject-Specific

625 Immunoglobulin Alleles From Expressed Repertoire Sequencing Data. FRONT IMMUNOL

626 2019;10

627

## 628 **Figure legend**

629 **Figure 1. The AUS identification pipeline.** The AUS identification pipeline is comprised with six  
630 steps, including **i)** V allele variant detection, **ii)** sequence annotation and assembly, **iii)** genotyping,  
631 **iv)** identification of consensus sequences within clonotypes, **v)** identification of consensus  
632 sequences within V alleles, and **vi)** score-based filtration.

633

634 **Figure 2. Overview of the discovered AUSs for heavy chain.** **(a)** The composition of discovered  
635 5' UTR and leader sequences. “Consistent” indicates sequences identical to those curated by  
636 IMGT/GENE DB. “Unknown” indicates sequences whose corresponding alleles were not  
637 provided with available AUSs. “Other” includes the rest four situations, which were illustrated on  
638 top of the donut charts. The number of novel sequences is marked in the center of each donut chart.  
639 **(b)** The length distribution of discovered 5' UTR and leader sequences. The length and its  
640 corresponding frequency were marked for each peak. **(c)** The distribution of the number of donors  
641 sharing a certain sequence. Different colors in (b) and (c) mean different groups and are consistent  
642 with those in (a). **(d)** Percentage of V genes as a function of the number of discovered 5' UTR and  
643 leader sequences.

644

645 **Figure 3. 5'UTR and leader sequence similarity within human and between species. (a)**

646 5'UTR sequence identity between V genes. **(b)** Leader sequence identity between V genes. **(c)** The  
647 number of shared 5'UTR sequences between V genes of different families. **(d)** The number of  
648 shared leader sequences between V genes of different families. The side color bar indicates gene  
649 families. **(e)** The correlation between 5'UTR or leader sequence identities and V allele sequence  
650 identities between human and four nonhuman species. The line in each scatterplot represents the  
651 fitted linear regression model. **(f)** V gene, 5'UTR and leader sequence identity between human and  
652 nonhuman species for antibody heavy chain. Genes were classified into core genes and noncore  
653 genes according to Yang et al., 2019.  $r$ , Pearson's correlation coefficient;  $p$ , p value of the linear  
654 model; \*\*,  $p < 0.01$ ; \*\*\*,  $p < 0.001$ .

655

656 **Figure 4. Characterization of SNPs observed in discovered leader sequences.** **(a)** The  
657 percentage of silent (S) and replacement (R) SNPs for heavy chain. R/S ratio was marked beneath  
658 each pie plot. **(b)** The percentage of intra-group and inter-group amino acid conversion. Note that  
659 amino acids here were classified according to their polarities. **(c)** Positional nucleotide diversity  
660 profile of leader sequences. The vertical lines mean the standard errors. Boxes in red represent the  
661 third nucleotides in codons. **(d)** The schematic representation of mismatches of published primers  
662 with discovered leader sequences. **(e)** The correlation between the contribution to the overall  
663 target sequences and the number of their mismatches with primers. **(f, g)** Schematic representation  
664 of SNP-associated V gene functional reversals, including pseudo-to-functional (f) and  
665 functional-to-pseudo transitions (g).

666

667 **Figure 5. Functional relevance of uAUGs and leader sequences to gene expression.** **(a)** The 5'

668 UTR length comparison between uAUG-containing group and uAUG-absent group in different  
669 species. The red asterisks marked the chains with reversed length difference between two groups.  
670 **(b)** The functional relevance of the number of uAUGs in 5' UTR sequences to gene expression for  
671 human heavy chain V genes. **(c)** The functional relevance of leader sequences to gene expression  
672 for human heavy chain V genes. L1, L2, and L3 represent unique leader sequences. L1 and L2 in  
673 different subplots are not necessarily the same. The number in the center of or on top of each bar  
674 mean the number of samples in each group. The vertical lines mean the standard errors. n. a. not  
675 available; n. s., not significant ( $p \geq 0.5$ ); \*,  $p < 0.05$ ; \*\*,  $p < 0.01$ ; \*\*\*,  $p < 0.001$ .  
676

**Table 1. Overview of discovered AUSs.**

| Species      | Chain | # unique AUSs | # unique 5' UTRs | # unique leaders | # alleles | # genes | % genes |
|--------------|-------|---------------|------------------|------------------|-----------|---------|---------|
| Human        | IGH   | 1111          | 1023             | 346              | 205       | 61      | 47.3    |
|              | IGk   | 498           | 458              | 189              | 138       | 43      | 44.3    |
|              | IGL   | 161           | 152              | 76               | 65        | 33      | 56.9    |
| RM           | IGH   | 5             | 5                | 2                | 2         | 2       | 3.8     |
|              | IGK   | 50            | 48               | 31               | 24        | 24      | 20.3    |
| CM           | IGH   | 136           | 132              | 69               | 52        | 52      | 35.1    |
| Mouse        | IGH   | 239           | 237              | 118              | 110       | 106     | 30.8    |
|              | IGK   | 256           | 256              | 96               | 93        | 91      | 54.2    |
| Rat          | IGH   | 399           | 379              | 162              | 126       | 126     | 32.3    |
|              | IGK   | 102           | 96               | 70               | 60        | 60      | 36.8    |
| <b>Total</b> | -     | <b>2957</b>   | <b>2786</b>      | <b>1159</b>      | -         | -       | -       |



**Table 2. Number and percentage of genes with identified uAUGs.**

| Species | Chain | # uAUG-containing AUs | % uAUG-containing AUs | # uAUGs-containing genes | % uAUGs-containing genes |
|---------|-------|-----------------------|-----------------------|--------------------------|--------------------------|
| Human   | IGH   | 138                   | 12.4                  | 23                       | 37.7                     |
|         | IGK   | 59                    | 11.9                  | 12                       | 27.9                     |
|         | IGL   | 14                    | 8.7                   | 4                        | 12.1                     |
| RM      | IGH   | 0                     | 0.0                   | 0                        | 0.0                      |
|         | IGK   | 32                    | 64.0                  | 15                       | 62.5                     |
| CM      | IGH   | 33                    | 24.3                  | 21                       | 40.4                     |
| Mouse   | IGH   | 75                    | 31.4                  | 40                       | 37.7                     |
|         | IGK   | 69                    | 27.0                  | 36                       | 39.6                     |
| Rat     | IGH   | 65                    | 16.3                  | 27                       | 21.4                     |
|         | IGK   | 28                    | 27.5                  | 18                       | 30.0                     |
